# Supplementary material for: A Polymeric Composite Material (rGO/PANI) for Acid Blue 129 Adsorption
Source: PubMed Central journal article supplement (PMC7285098; doi:10.3390/polym12051051), 2020-05-03
Supplement: polymers-12-01051-s001.pdf [file polymers-12-01051-s001.pdf]

1 Type of the Paper (Article, Review, Communication, etc.)

2 **A Polymeric Composite Material (rGO/PANI) for**  
 3 **Acid Blue 129 Adsorption**

4 **Tomasz Kukulski** <sup>1</sup>, **Stanisław Waclawek** <sup>2,\*</sup>, **Daniele Silvestri** <sup>2,\*</sup>, **Kamil Krawczyk** <sup>2</sup>, **Vinod V. T.**  
 5 **Padil** <sup>2</sup>, **Ryszard Fryczkowski** <sup>1</sup>, **Jarosław Janicki** <sup>1</sup> and **Miroslav Černík** <sup>2</sup>

6 <sup>1</sup> Institute of Textile Engineering and Polymer Materials, University of Bielsko-Biala, Willowa 2, 43-309  
 7 Bielsko-Biala, Poland; tkukulski@ath.bielsko.pl (T.K.); rfryczkowski@ath.bielsko.pl (R.F.);  
 8 jjanicki@ath.bielsko.pl (J.J.)

9 <sup>2</sup> Institute for Nanomaterials, Advanced Technologies and Innovation, Technical University of Liberec,  
 10 Studentská 1402/2, 46117 Liberec 1, Czech Republic; kamil.krawczyk@tul.cz (K.K.); vinod.padil@tul.cz  
 11 (V.V.T.P.); miroslav.cernik@tul.cz (M. Č.)

12 \* Correspondence: stanislav.waclawek@tul.cz (S.W.); [daniele.silvestri@tul.cz](mailto:daniele.silvestri@tul.cz) (D.S.)

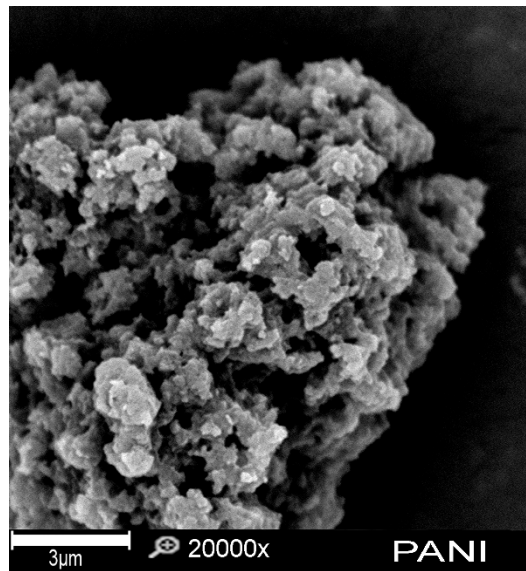

13

14

**Figure S1.** SEM image of PANI (scale bar represents 3 μm).

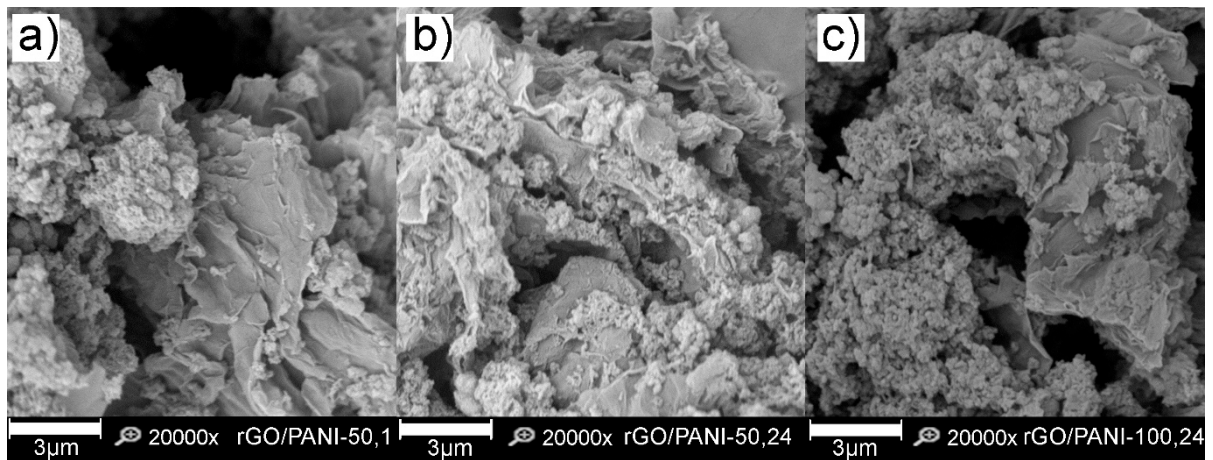

15

16

17

**Figure S2.** SEM images of a) rGO/PANI-50,1 b) rGO/PANI-50,24, c) rGO/PANI-100,24 composites (scale bar represents 3 μm).

18

19  
20**Table S1.** R<sup>2</sup> values for kinetics experiments of rGO/PANI composite for pseudo-first-order (1<sup>st</sup>) and pseudo-second-order (2<sup>nd</sup>) kinetic model.

| Time (h) | Temperature (°C)      |                       |                       |
|----------|-----------------------|-----------------------|-----------------------|
|          | 0                     | 50                    | 100                   |
| 1        | 1 <sup>st</sup> 0.939 | 1 <sup>st</sup> 0.781 | 1 <sup>st</sup> 0.709 |
|          | 2 <sup>nd</sup> 0.999 | 2 <sup>nd</sup> 0.990 | 2 <sup>nd</sup> 0.990 |
| 8        | 1 <sup>st</sup> 0.511 | 1 <sup>st</sup> 0.277 | 1 <sup>st</sup> 0.574 |
|          | 2 <sup>nd</sup> 0.998 | 2 <sup>nd</sup> 0.908 | 2 <sup>nd</sup> 0.998 |
| 24       | 1 <sup>st</sup> 0.398 | 1 <sup>st</sup> 0.829 | 1 <sup>st</sup> 0.595 |
|          | 2 <sup>nd</sup> 0.998 | 2 <sup>nd</sup> 0.999 | 2 <sup>nd</sup> 0.999 |

21

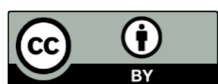

© 2020 by the authors. Submitted for possible open access publication under the terms and conditions of the Creative Commons Attribution (CC BY) license (<http://creativecommons.org/licenses/by/4.0/>).

22
